# Supplementary material
Source: publisher figshare collection journal article supplement (https://acs.figshare.com/ndownloader/files/3929332)
Supplement: Supplementary file 1 [file 3929332]

Supporting Information for:

Layered Double Hydroxide-Supported Carbon Dots as an Efficient  
Heterogeneous Fenton-Like Catalyst for Generation of Hydroxyl Radicals

By Manlin Zhang<sup>†</sup>, Qingfeng Yao<sup>†</sup>, Weijiang Guan<sup>†</sup>, Chao Lu<sup>†,\*</sup>, and Jin-Ming Lin<sup>‡</sup>

*<sup>†</sup>State Key Laboratory of Chemical Resource Engineering, Beijing University of Chemical  
Technology, Beijing 100029, China*

*<sup>‡</sup>Department of Chemistry, Tsinghua University, Beijing 100084, China*

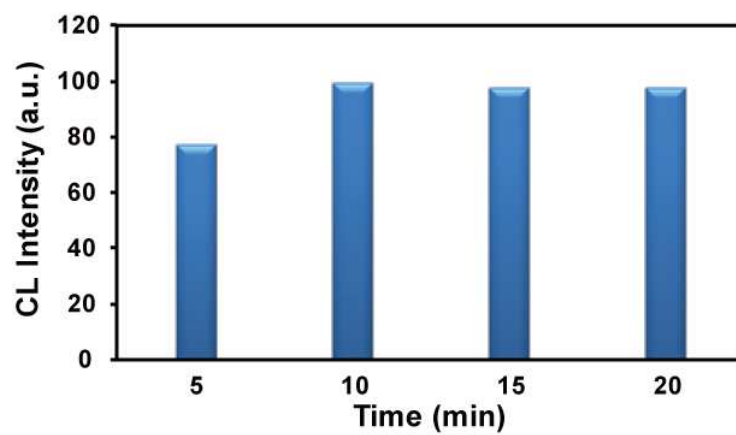

**Figure S1** Effect of stirring time for the CL intensity of the carbon dot-DBS-LDH-acidified  $\text{H}_2\text{O}_2$  system.

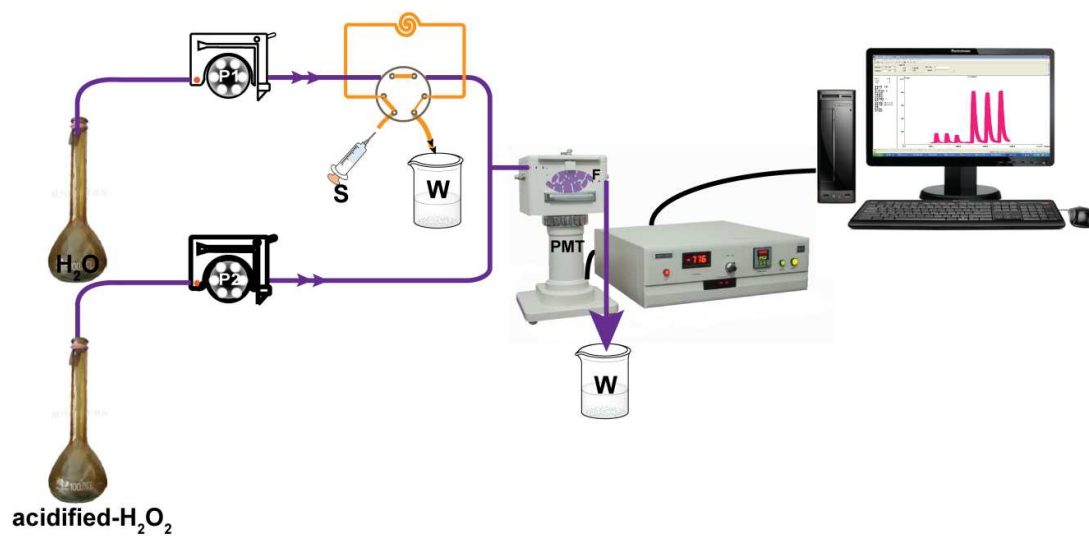

**Figure S2** Schematic diagram of the CL flow-through device.  $\text{P}_1$  and  $\text{P}_2$ , peristaltic pumps;  $\text{S}$ , sample injector (carbon dot-DBS-LDHs);  $\text{F}$ , flow cell;  $\text{W}$ , waste;  $\text{PMT}$ , photomultiplier tube (-1100 V);  $\text{H}_2\text{O}$  at 1.0 mL/min; acidified  $\text{H}_2\text{O}_2$  at 2.0 mL/min.

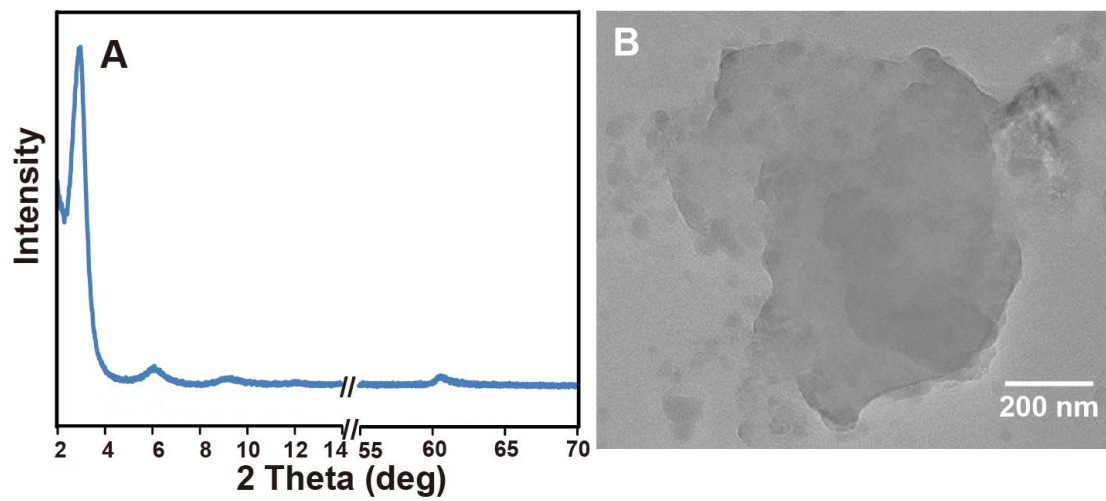

**Figure S3** (A) Powder XRD patterns, (B) TEM image of DBS-LDHs.

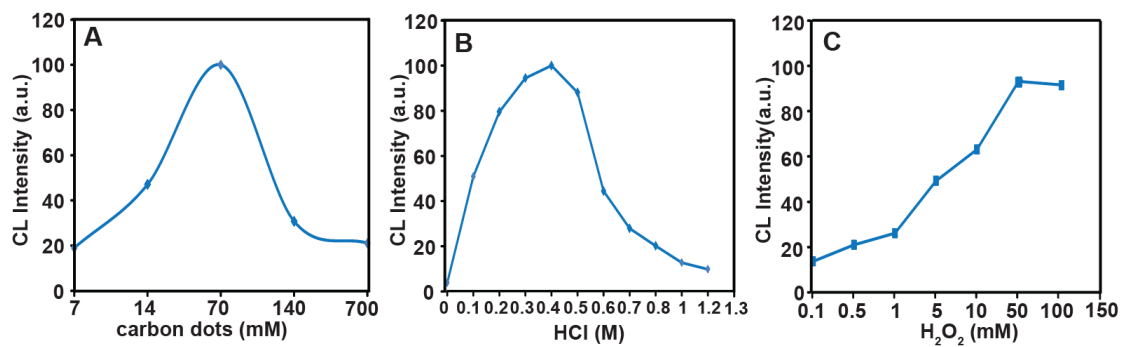

**Figure S4** Effects of various conditions on the CL intensity, (A) concentration of carbon dots, (B) concentration of HCl, (C) concentration of H<sub>2</sub>O<sub>2</sub>.

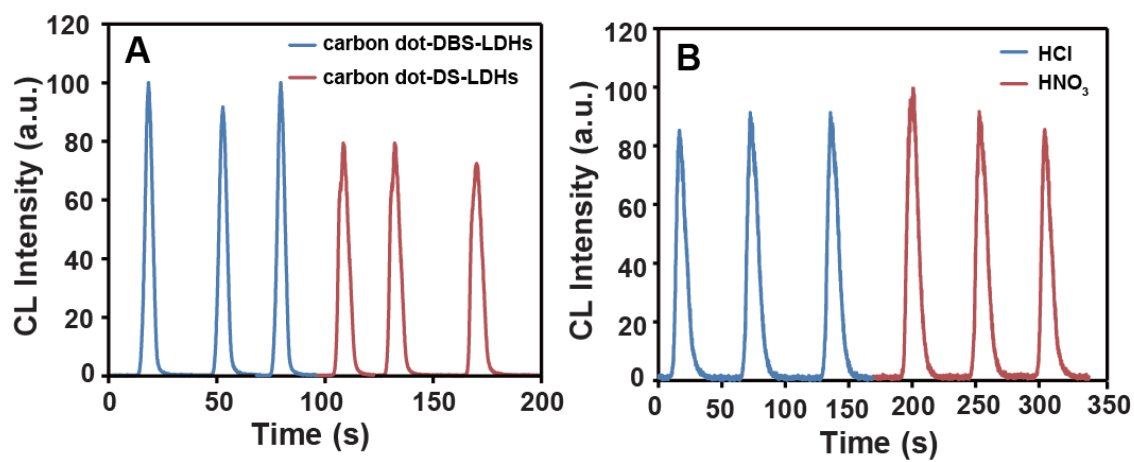

**Figure S5** CL intensity of (A) acidified H<sub>2</sub>O<sub>2</sub> mixed with carbon dot-DBS-LDHs or carbon dot-DS-LDHs, (B) carbon dot-DBS-LDH-H<sub>2</sub>O<sub>2</sub> mixed with HCl or HNO<sub>3</sub>.

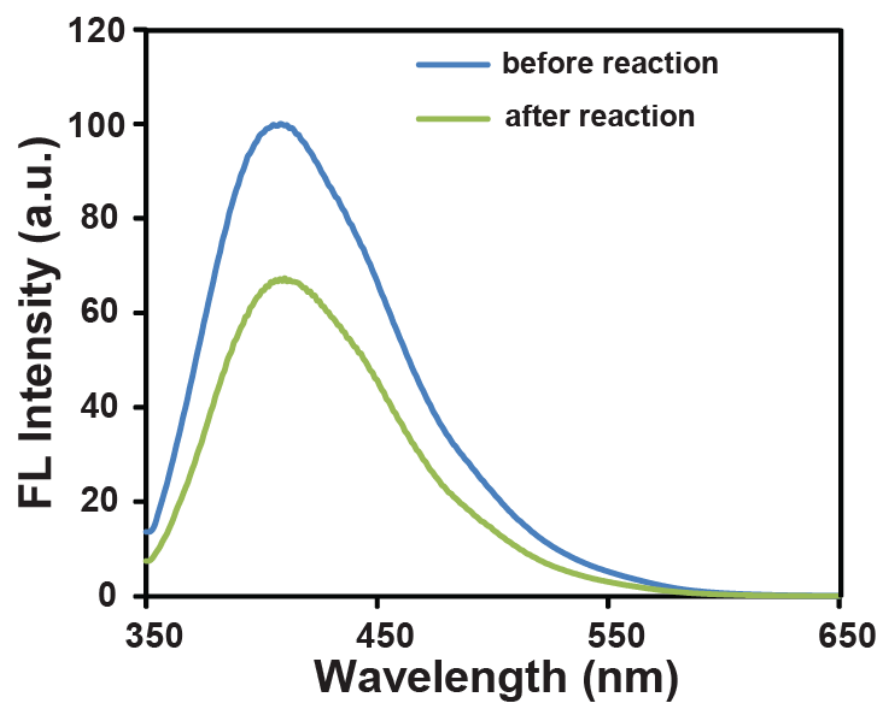

**Figure S6** Fluorescence spectra of carbon dot-DBS-LDHs before and after reaction.

**Table S1** Effects of radical scavengers on carbon dot-DBS-LDH-acidified H<sub>2</sub>O<sub>2</sub> system<sup>a</sup>.

| Radical scavengers | Concentration (mM) | CL intensity <sup>b</sup> |
|--------------------|--------------------|---------------------------|
| H <sub>2</sub> O   |                    | 100                       |
| ascorbic acid      | 10                 | 28                        |
| thiourea           | 50                 | 33.9                      |
| histidine          | 30                 | 99.8                      |
| DABCO              | 30                 | 97.1                      |
| NaN <sub>3</sub>   | 30                 | 99.7                      |
| NBT                | 30                 | 98.4                      |

<sup>a</sup> The experiments were carried out with flow injection system.

<sup>b</sup> All of the results were the mean of three determinations.
